# Supplementary material
Source: publisher figshare collection journal article supplement (https://gsapubs.figshare.com/ndownloader/files/22399302)

## **SUPPLEMENTAL FILE 1. STATISTICAL ANALYSIS IN GREATER DETAIL AND JUSTIFICATION OF $k$ -VALUE**

In order to investigate the effect of the selected number of clusters,  $k$ , on the statistical results and to evaluate the impact on the ability to distinguish the 10 major lithological classifications of the New Jersey successions, a variety of tables and plots are presented in Supplemental File 1. Table (a) compares average within-cluster distances and between-cluster distances (summed deviation about seed points) for  $k = 2$  to  $k = 25$ . Due to the gradational nature of the spectral gamma-ray data set presented in this paper, the selected choice of  $k$  is not optimal in the true sense of the word and, although formal methods of determining  $k$  exist, there is debate over the most appropriate method (e.g., Pham et al., 2005). Less formal methods involve either a simple visual choice of the most appropriate  $k$  or an analysis of changes in the within-cluster distances or other empirical measures with increasing  $k$ : see columns with gray text and shown graphically in plots (b) to (d). Average within-cluster distances decrease with increasing  $k$  and the summed deviation about seed points multiplied by  $k$  increases. In both cases, break-points could indicate the optimum number of clusters, whereas where values become nearly constant this suggests that the optimum number of clusters has been reached prior to this point. Plot (d) shows the derivative of the difference between successive summed deviations with the larger differences maybe indicating the optimum number of clusters. From these plots, a likely possibility for the optimum number of clusters is at  $k = 4$ . However, due to the ambiguity of this in such data sets and also the hypothesis in this paper that the 10 major lithological classifications can be identified from a statistical analysis, the remaining data in Supplemental File 1 compare the  $k = 10$  cluster example to the  $k = 4$  cluster example.

Tables (e) and (g) and their corresponding three-dimensional plots (f) and (h) compare cluster characteristics where  $k = 10$  and  $k = 4$ . Table (i) lists four key characteristics in terms of K, U, and Th concentrations with the clusters that correspond to these alongside for both examples. Note that the comparisons between clusters of the two examples should be considered a guide only (gray text) rather than a formal statistical assessment. Plot (j) is a comparison of lithology and clusters downhole for  $k = 10$  and  $k = 4$  (colors as in the three-dimensional plots). These direct comparisons between  $k = 10$  (used herein) and  $k = 4$  highlight the benefits of using  $k = 10$  for the lithological comparisons presented here (see key to starred intervals), particularly to diagnose those sediments containing glauconite.

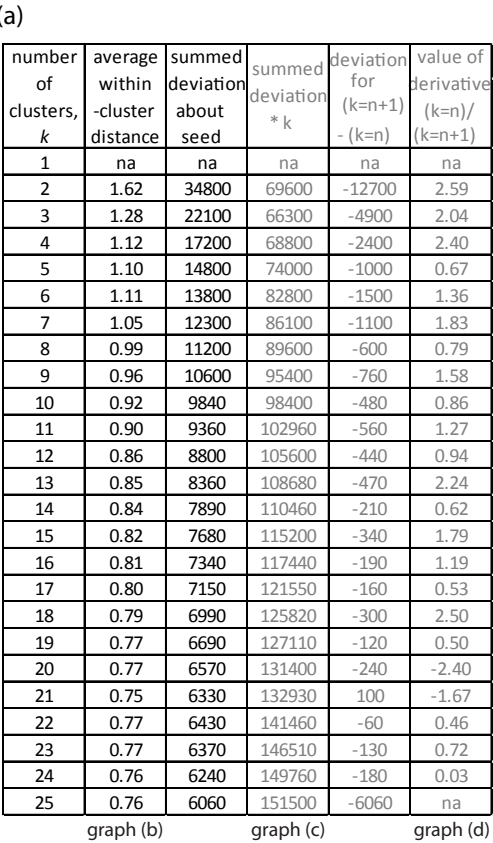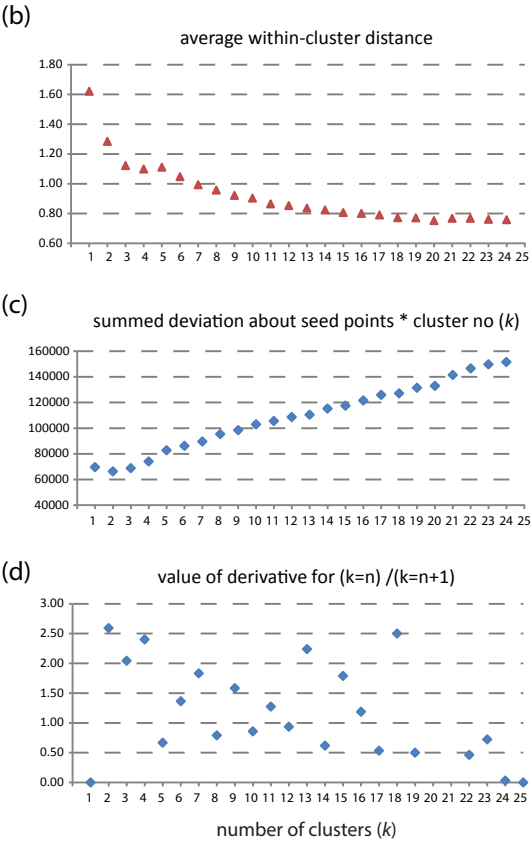

(e)

| 10 cluster example (k=10) | Number of data in cluster | Within-cluster mean distance | Cluster centroids |           |            |
|---------------------------|---------------------------|------------------------------|-------------------|-----------|------------|
|                           |                           |                              | K (Bq/kg)         | U (Bq/kg) | Th (Bq/kg) |
| C1                        | 4697                      | 0.59                         | 87                | 8         | 6          |
| C2                        | 1218                      | 0.86                         | 161               | 19        | 38         |
| C3                        | 2930                      | 0.64                         | 149               | 26        | 21         |
| C4                        | 1690                      | 0.79                         | 273               | 20        | 12         |
| C5                        | 915                       | 0.92                         | 268               | 43        | 24         |
| C6                        | 1783                      | 0.75                         | 169               | 38        | 12         |
| C7                        | 716                       | 1.16                         | 501               | 64        | 21         |
| C8                        | 157                       | 1.60                         | 520               | 110       | 22         |
| C9                        | 601                       | 1.21                         | 584               | 30        | 14         |
| C10                       | 2084                      | 0.70                         | 256               | 17        | 27         |
| Mean                      | 1679                      | 0.92                         | 201               | 24        | 17         |
|                           |                           | Delta                        | 3.11              | 3.69      | 2.2        |

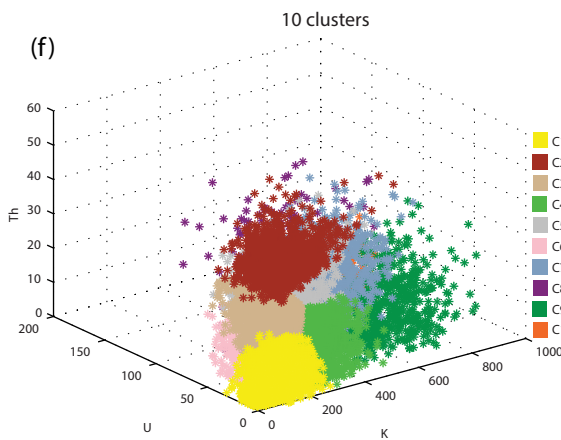

(g)

| 4 cluster example (k=4) | Number of data in cluster | Within-cluster mean distance | Cluster centroids |           |            |
|-------------------------|---------------------------|------------------------------|-------------------|-----------|------------|
|                         |                           |                              | K (Bq/kg)         | U (Bq/kg) | Th (Bq/kg) |
| C1                      | 5272                      | 0.69                         | 99                | 9         | 6          |
| C2                      | 5735                      | 0.94                         | 204               | 31        | 16         |
| C3                      | 1588                      | 1.87                         | 520               | 56        | 19         |
| C4                      | 4196                      | 0.98                         | 204               | 20        | 30         |
| Mean                    | 4198                      | 1.12                         | 201               | 24        | 17         |
|                         |                           | Delta                        | 2.53              | 2.13      | 2.2        |

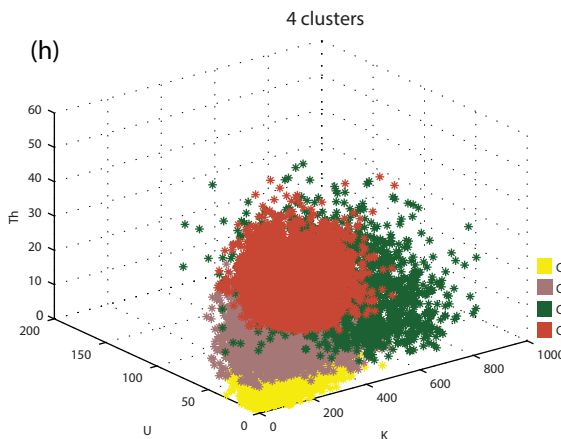

(i)

| cluster characteristics | corresponding cluster in k=4 example | corresponding cluster(s) in k=10 example |
|-------------------------|--------------------------------------|------------------------------------------|
| K, U and Th all low     | C1                                   | C1                                       |
| K, U and Th moderate    | C2                                   | C3,C4,C5,C6                              |
| K and/or U high         | C3                                   | C7,C8,C9                                 |
| Th high                 | C4                                   | C2,C10                                   |

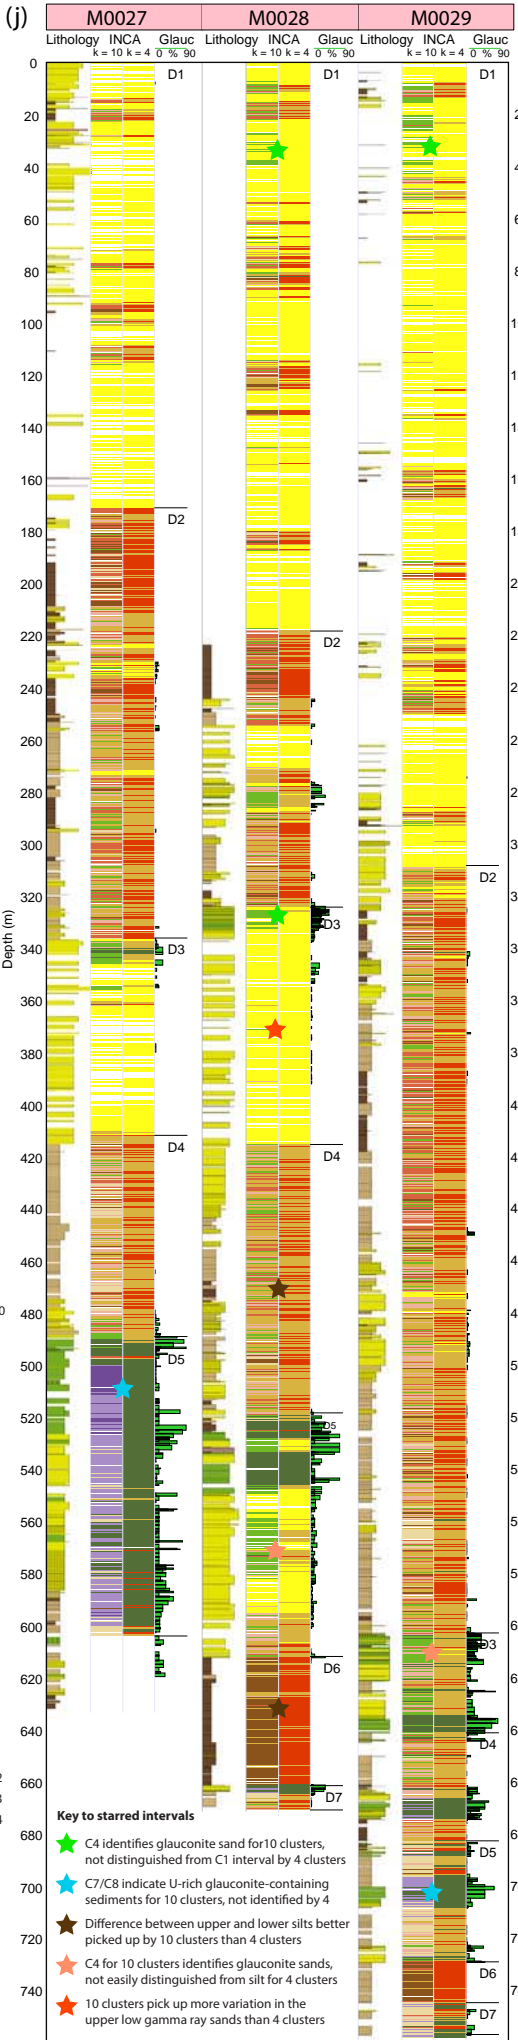

Supplement: Supplementary file 1 [file 22399302]
